# Supplementary material for: Analysis of Telomere Maintenance Related Genes Reveals NOP10 as a New Metastatic-Risk Marker in Pheochromocytoma/Paraganglioma
Source: MDPI journal article supplement (doi:10.3390/cancers13194758), 2021-09-23
Supplement: s1 [file cancers-1375820-Suplementarias 21.09.2021.pdf › cancers-1375820-Suplementarias 21.09.2021.pdf]

| Sample  | ATRX mutation                      | Platform             | Expression Level |
|---------|------------------------------------|----------------------|------------------|
| 17T76   | c.3622dup, p.Ile1208AsnfsTer4      | WES                  | 8.84*            |
| 12T232  | c.6252C>A ;p.Tyr2084Ter            | NGS customized panel | 9.27*            |
| 17T156  | c.5268_5272del                     | WES                  | 9.91*            |
| 18T165  | c.1493_1496del; p.Arg498LysfsTer15 | WES                  | 10.18            |
| 17T77-1 | c.1094del;p.Asn365ThrfsTer2        | WES                  | 10.28            |
| 07T147  | c.1441G>T; p.Glu481Ter             | WES                  | 10.82            |

**Supplementary Table S1.** Summary of the mutations found in *ATRX* by NGS (exome sequencing and customized panel). Expression outliers are marked with an asterisk (\*).

| Primer name              | Type    | Sequence                                                        |
|--------------------------|---------|-----------------------------------------------------------------|
| TERT promoter (NGS)      | Forward | TCGTCGGCAGCGTCAGATGTGTATAAGAGACAG <b>CAGCGCTGCCTGAAACTCG</b>    |
|                          | Reverse | GTCTCGTGGGCTCGGAGATGTGTATAAGAGACAG <b>GTCTCTGCCCTTCACCTTC</b>   |
| THOR_A1 (NGS)            | Forward | TCGTCGGCAGCGTCAGATGTGTATAAGAGACAG <b>GGGAGGGGTGGGAGGGTT</b>     |
|                          | Reverse | GTCTCGTGGGCTCGGAGATGTGTATAAGAGACAG <b>CTACCCCTTCACCTT</b>       |
| THOR_A2 (NGS)            | Forward | TCGTCGGCAGCGTCAGATGTGTATAAGAGACAG <b>AGTTGGAAGGTGAAGGGGTAGG</b> |
|                          | Reverse | GTCTCGTGGGCTCGGAGATGTGTATAAGAGACAG <b>AACTCCCAATAAATTC</b>      |
| THOR_A3 (NGS)            | Forward | TCGTCGGCAGCGTCAGATGTGTATAAGAGACAG <b>GAATTTATTGGGAGTT</b>       |
|                          | Reverse | GTCTCGTGGGCTCGGAGATGTGTATAAGAGACAG <b>TCCCTACACCCTAAAAA</b>     |
| THOR_A4 (NGS)            | Forward | TCGTCGGCAGCGTCAGATGTGTATAAGAGACAG <b>GTTTAGGTTGTGGGGTAATT</b>   |
|                          | Reverse | GTCTCGTGGGCTCGGAGATGTGTATAAGAGACAG <b>CTAAAAACAACCCTAAATC</b>   |
| TERT promoter (Sanger)   | Forward | GTCCTGCCCTTCACCTTC                                              |
|                          | Reverse | CAGCGCTGCCTGAAACTC                                              |
| NOP10 exon 1 (Sanger)    | Forward | GCAGGAAGGAAATTGACGAA                                            |
| NOP10 exon 2 (Sanger)    | Reverse | CGTATGACCTCACCCACTCC                                            |
|                          | Forward | AGCAGAAATTTGACCCGATG                                            |
| TERT (RT-PCR) UPL #18    | Reverse | TAAGGGACCCTCAGAGGACA                                            |
|                          | Forward | CGGTGTGCACCAACATCTAC                                            |
| NOP10 (RT-PCR) UPL #15   | Reverse | GCACACATGCGTGAAACCT                                             |
|                          | Forward | GGGACAACAGACCTGCTCA                                             |
| β-ACTIN (RT-PCR) UPL #11 | Reverse | GGTGATTCGGTGTCGAGAGT                                            |
|                          | Forward | ATTGGCAATGAGCGGTTC                                              |
|                          | Reverse | CGTGGATGCCACAGGACT                                              |

**Supplementary Table S2.** Summary of the primers used for NGS in blue, Sanger sequencing in green and RT-PCR in purple. NGS primers specific sequence in bold, common adapters in regular type.

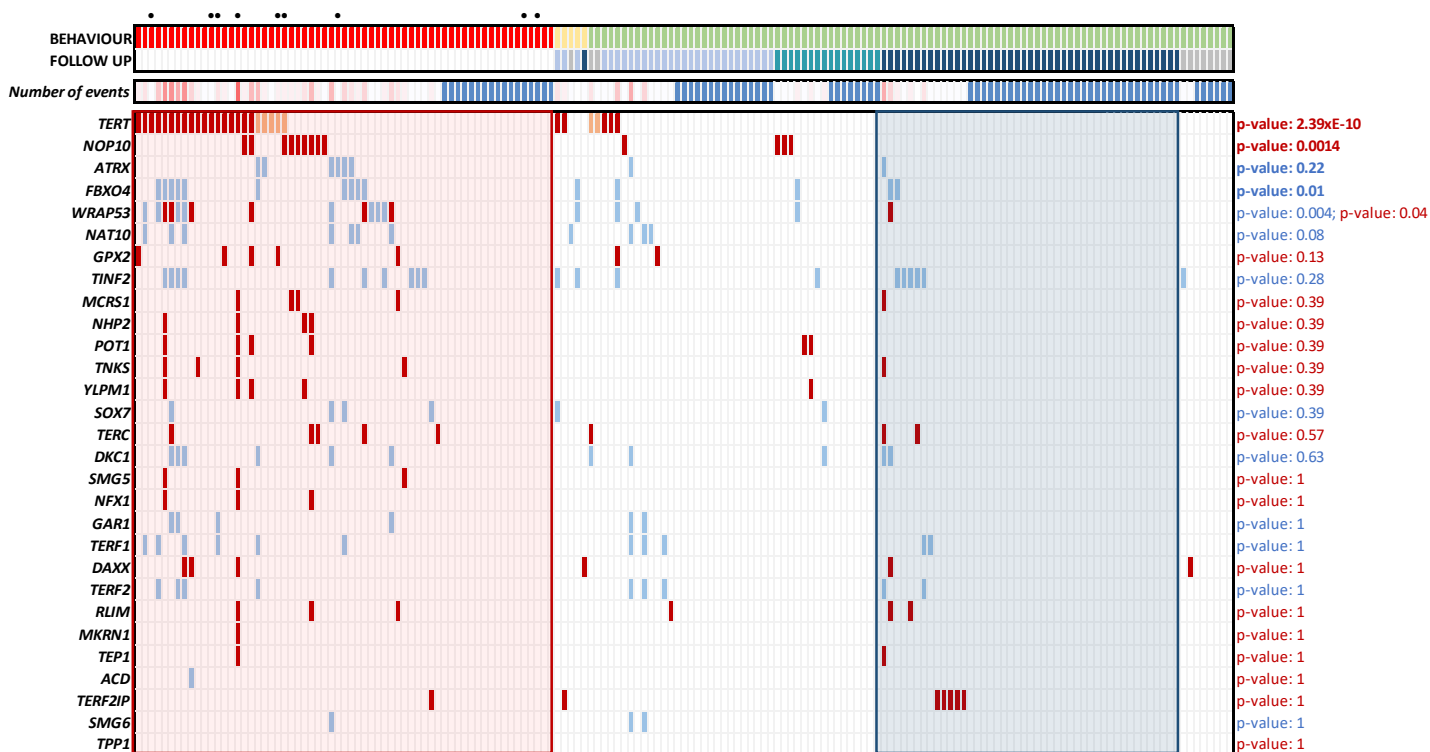

**Supplementary Figure S1.** Print of *telomerase* expression outliers. Bonferroni corrected p-values (Fisher exact test; in red: over Q3+(1,5 x IQR) and in blue: below Q1-(1,5 x IQR)). Thresholds were established comparing mPPGL (red rectangle) with >8 years of follow-up tumors (blue rectangle). mPPGL (N=63); non-mPPGL >8 years of follow-up (N=45). Black dots indicate metastasis.

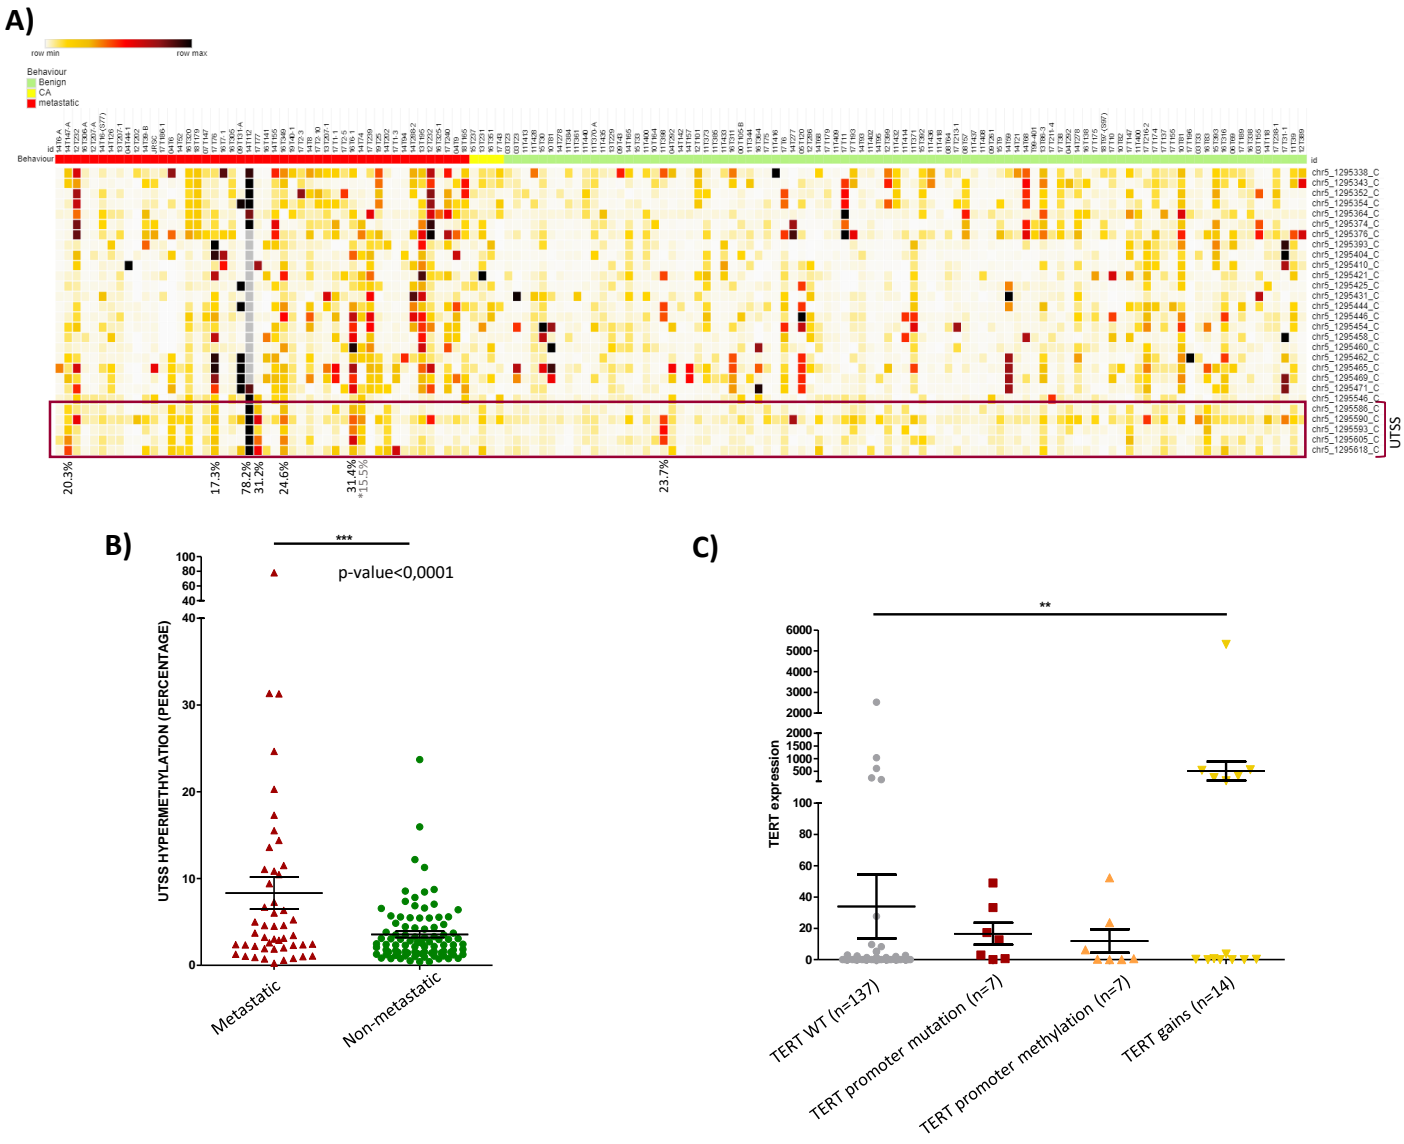

**Supplementary Figure S2. Mechanisms altering *TERT* expression:** **A)** Heatmap of *TERT* promoter methylation levels in PPGL. UTSS methylation average value is shown for those samples beyond threshold ( $\geq 16,1\%$ ). **B)** Percentage of UTSS methylation in metastatic (n=48) and non-metastatic samples (n=93) (clinically aggressive were excluded from the analysis). **C)** Correlation of *TERT* expression values with *TERT* different events. 5p gains are significantly associated with higher expression levels.

| Univariate logistic regression |        |          |        |                       |
|--------------------------------|--------|----------|--------|-----------------------|
| Variable                       | OR     | I.C. 95% |        | p-value               |
|                                |        | Lower    | Upper  |                       |
| SDHB                           | 4.48   | 1.773    | 11.319 | 0.002                 |
| TERT+ATRX                      | 25.625 | 8.211    | 79.973 | 2,33x E <sup>-8</sup> |
| NOP10                          | 3.565  | 1.018    | 12.486 | 0.047                 |
| FBXO4                          | 4.65   | 1.318    | 15.718 | 0.013                 |

| Stepwise logistic regression |       |          |        |                       |
|------------------------------|-------|----------|--------|-----------------------|
| Variables                    | OR    | I.C. 95% |        | p-value               |
|                              |       | Lower    | Upper  |                       |
| TERT+ATRX                    | 28.5  | 8.963    | 90.623 | 1.38x E <sup>-8</sup> |
| NOP10                        | 5.346 | 1.34     | 21.32  | 0.0175                |

**Supplementary Table S3.** Univariate logistic regression analysis and stepwise conditional logistic regression model to assess the odds of metastasis risk. Each variable was dichotomized according to the presence or absence of any of the analyzed alterations.

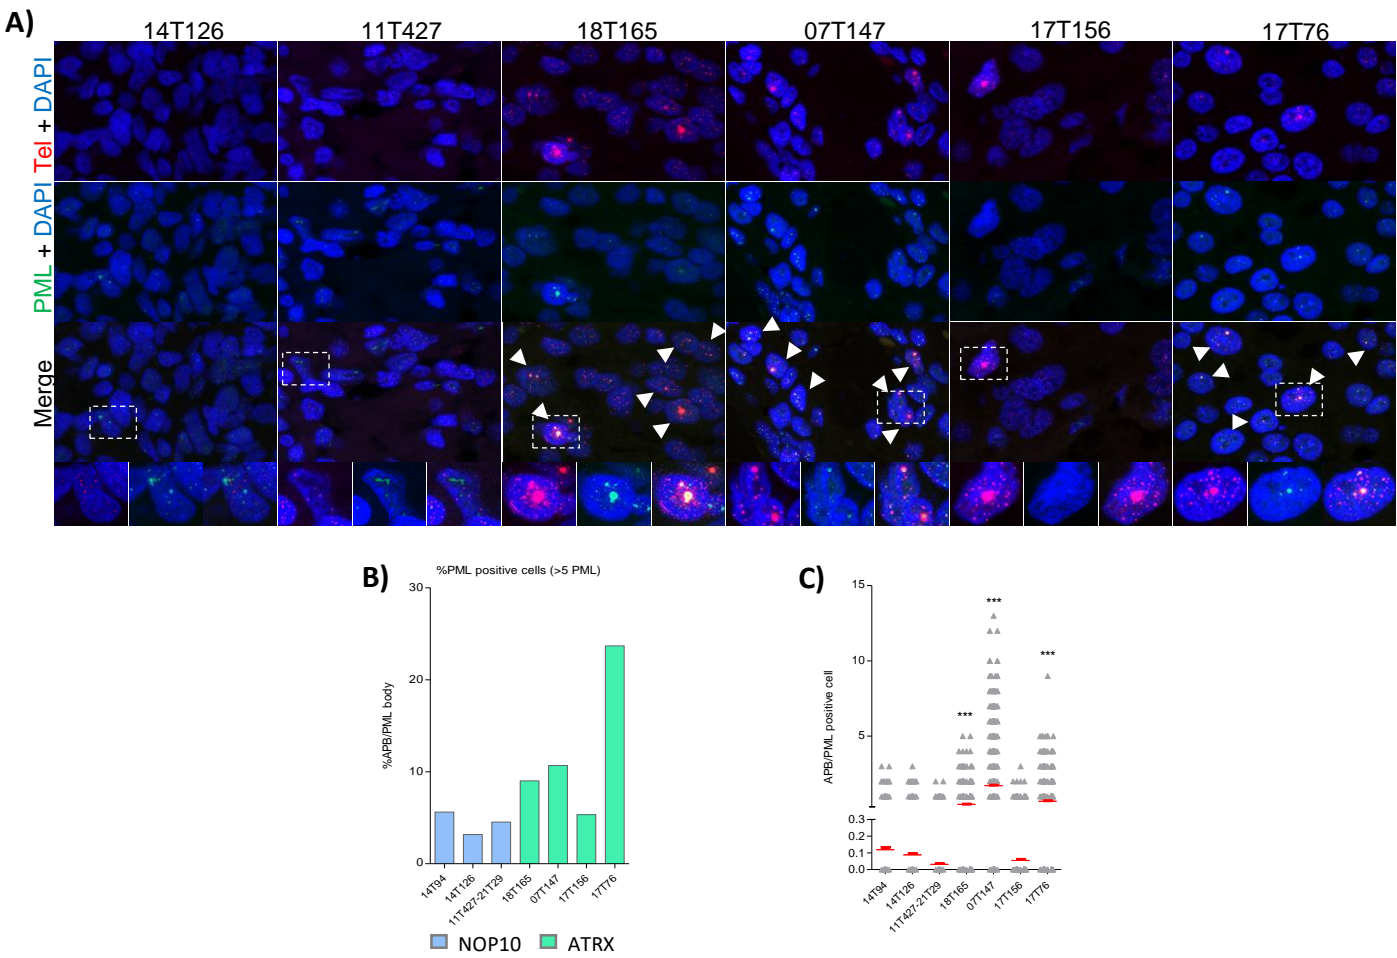

**Supplementary Figure S3. APBs detection. A)** Representative Immuno-FISH images of long telomere samples detected by Q-FISH. PML bodies are present in every sample at different proportions (<5 PML are not considered). *NOP10* altered samples show long telomeres but no colocalization with PML bodies was detected. *ATRX* mutant PPGL show extreme long telomeres which colocalize with PML bodies (white arrows pointing APBs). 17T156 sample present the same long telomeres but any APB was detected. **B)** Percentage of PML bodies per cell. Higher number of PMLs are detected in *ATRX* mutants. **C)** Number of APBs (colocalizations) detected per cell in each sample. Red line represents the median value.

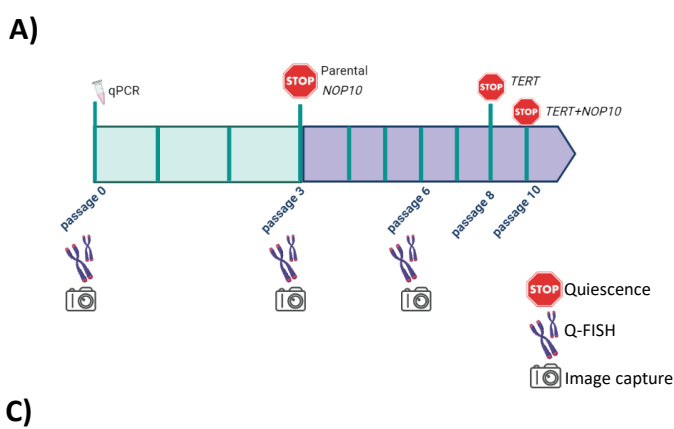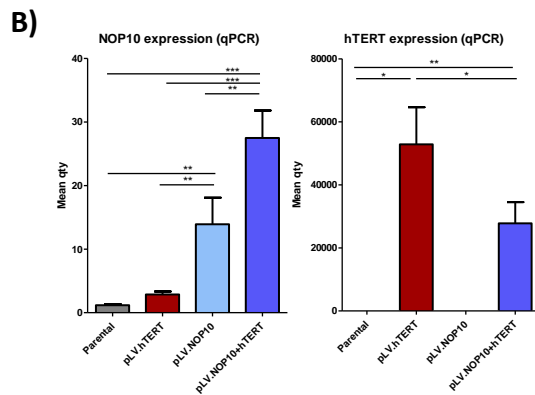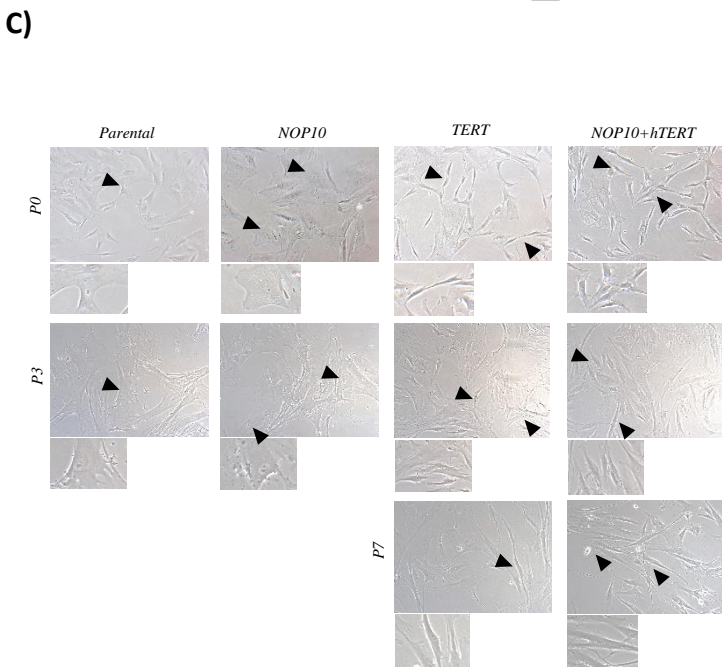

**Supplementary Figure S4.** Summary of in-vitro experiment. **A)** Overall view of the protocol followed in the cell culture experiment. Passage 0: RT-qPCR and Q-FISH for all the conditions. Passage 3: Q-FISH for all the conditions; Parental and *NOP10* become quiescent, *TERT* and *TERT+NOP10* continue dividing. Passage 6: Q-FISH for *TERT* and *TERT+NOP10*. Passage 8: *TERT* become quiescent. Passage 10: *TERT+NOP10* become quiescent **B)** RT-PCR of *NOP10* and *hTERT* expression levels in cells after infection for each experimental condition (One-way ANOVA). **C)** Representative images of cell proliferation in each passage. Black arrows showing quiescent cells: expanded morphology (Parental and *NOP10*); dividing cells: fibroblastic morphology and spherical refringent spots (*TERT* and *TERT+NOP10*).
